# Supplementary material for: Cs,Rh-codoped WO3with a core–shell structure responsive up to 600 nm as an O2-evolving photocatalyst forZ-schematic water splitting
Source: Royal Society of Chemistry journal article supplement (doi:10.1039/d2se00687a), 2022-01-01
Supplement: d2se00687a1.pdf [file d2se00687a1.pdf]

## Electronic Supplementary Information

### **Cs,Rh-codoped WO<sub>3</sub> with a core-shell structure responsive up to 600 nm as an O<sub>2</sub>-evolving photocatalyst for Z-schematic water splitting**

Kenta Watanabe, Yugo Miseki\* and Kazuhiro Sayama\*

Artificial Photosynthesis Research team, Global Zero Emission Research Center (GZR), National Institute of Advanced Industrial Science and Technology (AIST), Tsukuba West, 16-1 Onogawa, Tsukuba, Ibaraki, 305-8569, Japan

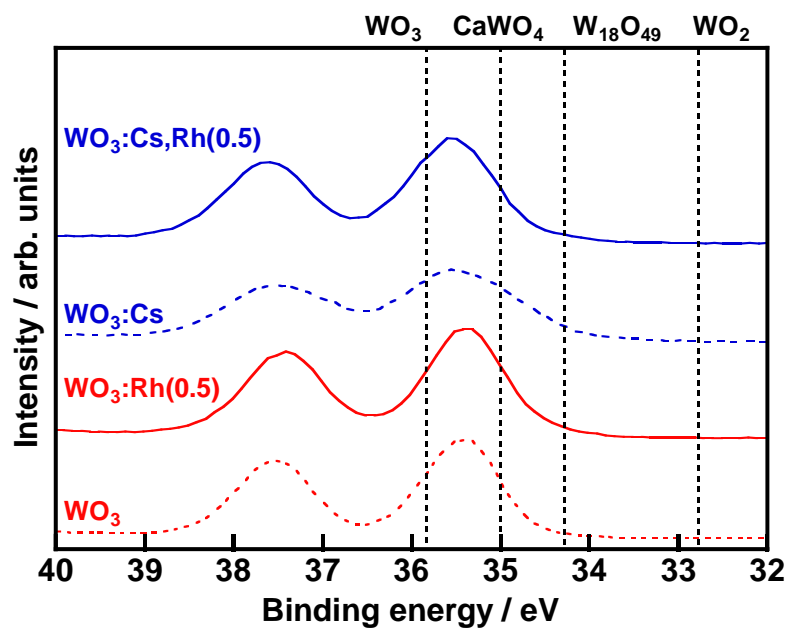

**Fig. S1** W4f XPS spectra of WO<sub>3</sub>, WO<sub>3</sub>:Rh(0.5), WO<sub>3</sub>:Cs, and WO<sub>3</sub>:Cs,Rh(0.5) synthesized by a solid-state reaction at 1273 K for 5 h. The binding energy of the peaks was calibrated with C 1s (284.2 eV).

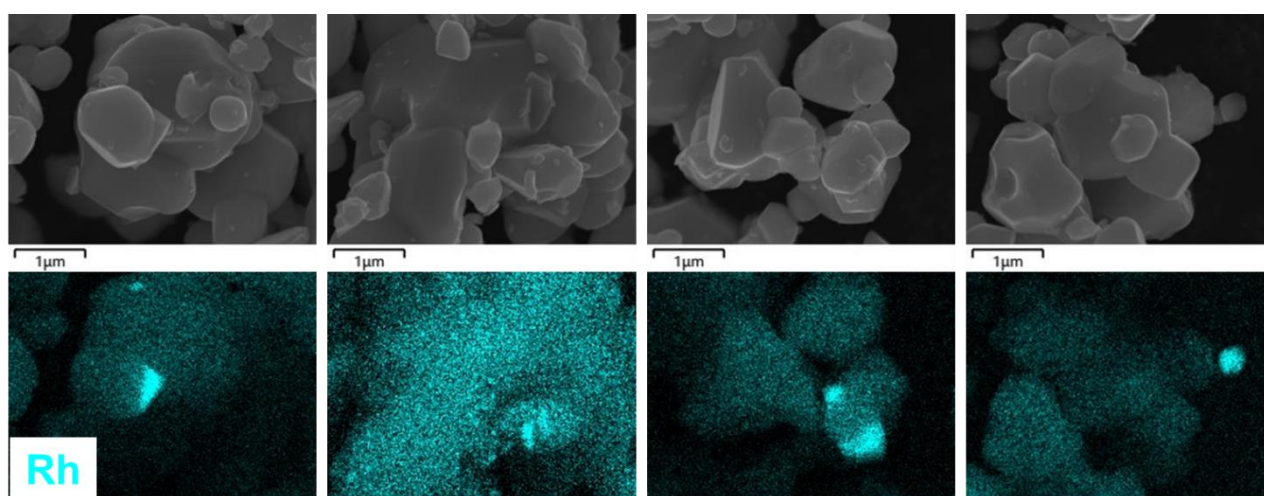

**Fig. S2** SEM and Rh-EDS mapping images of WO<sub>3</sub>:Rh(0.5) synthesized by a solid-state reaction at 1273 K for 5 h.

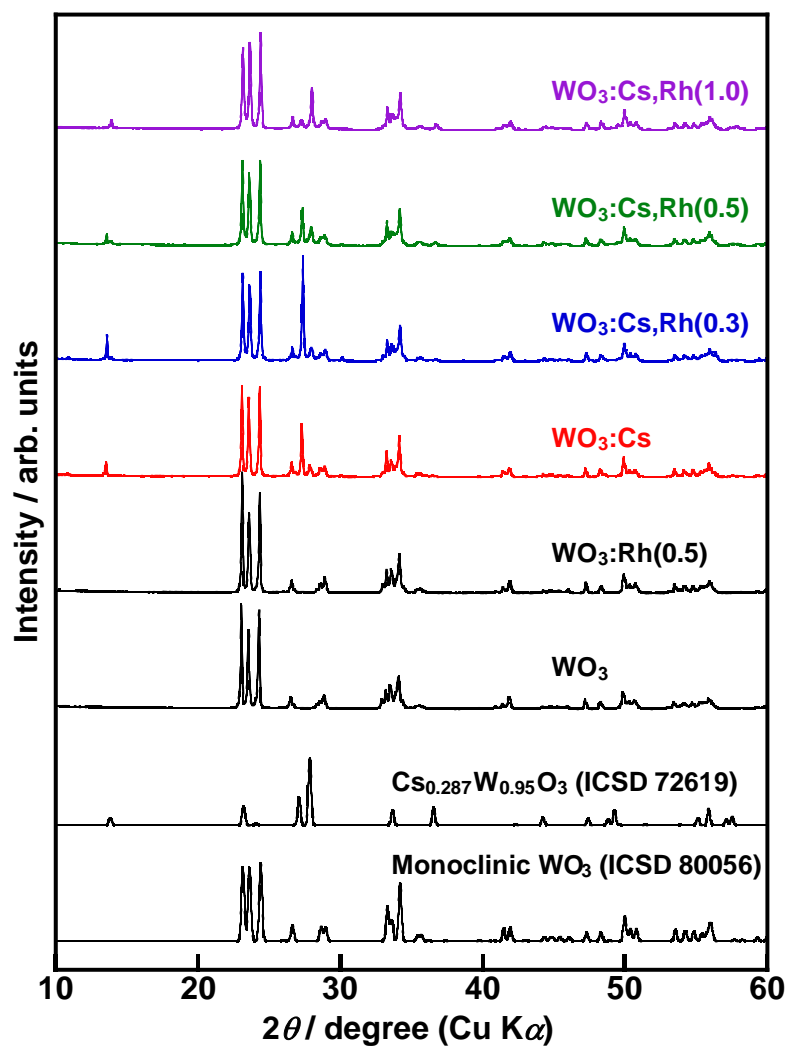

**Fig. S3** XRD patterns of WO<sub>3</sub>, WO<sub>3</sub>:Rh(0.5), and WO<sub>3</sub>:Cs,Rh(x%) (x = 0, 0.3, 0.5, 1.0) synthesized by a solid-state reaction at 1273 K for 5 h.

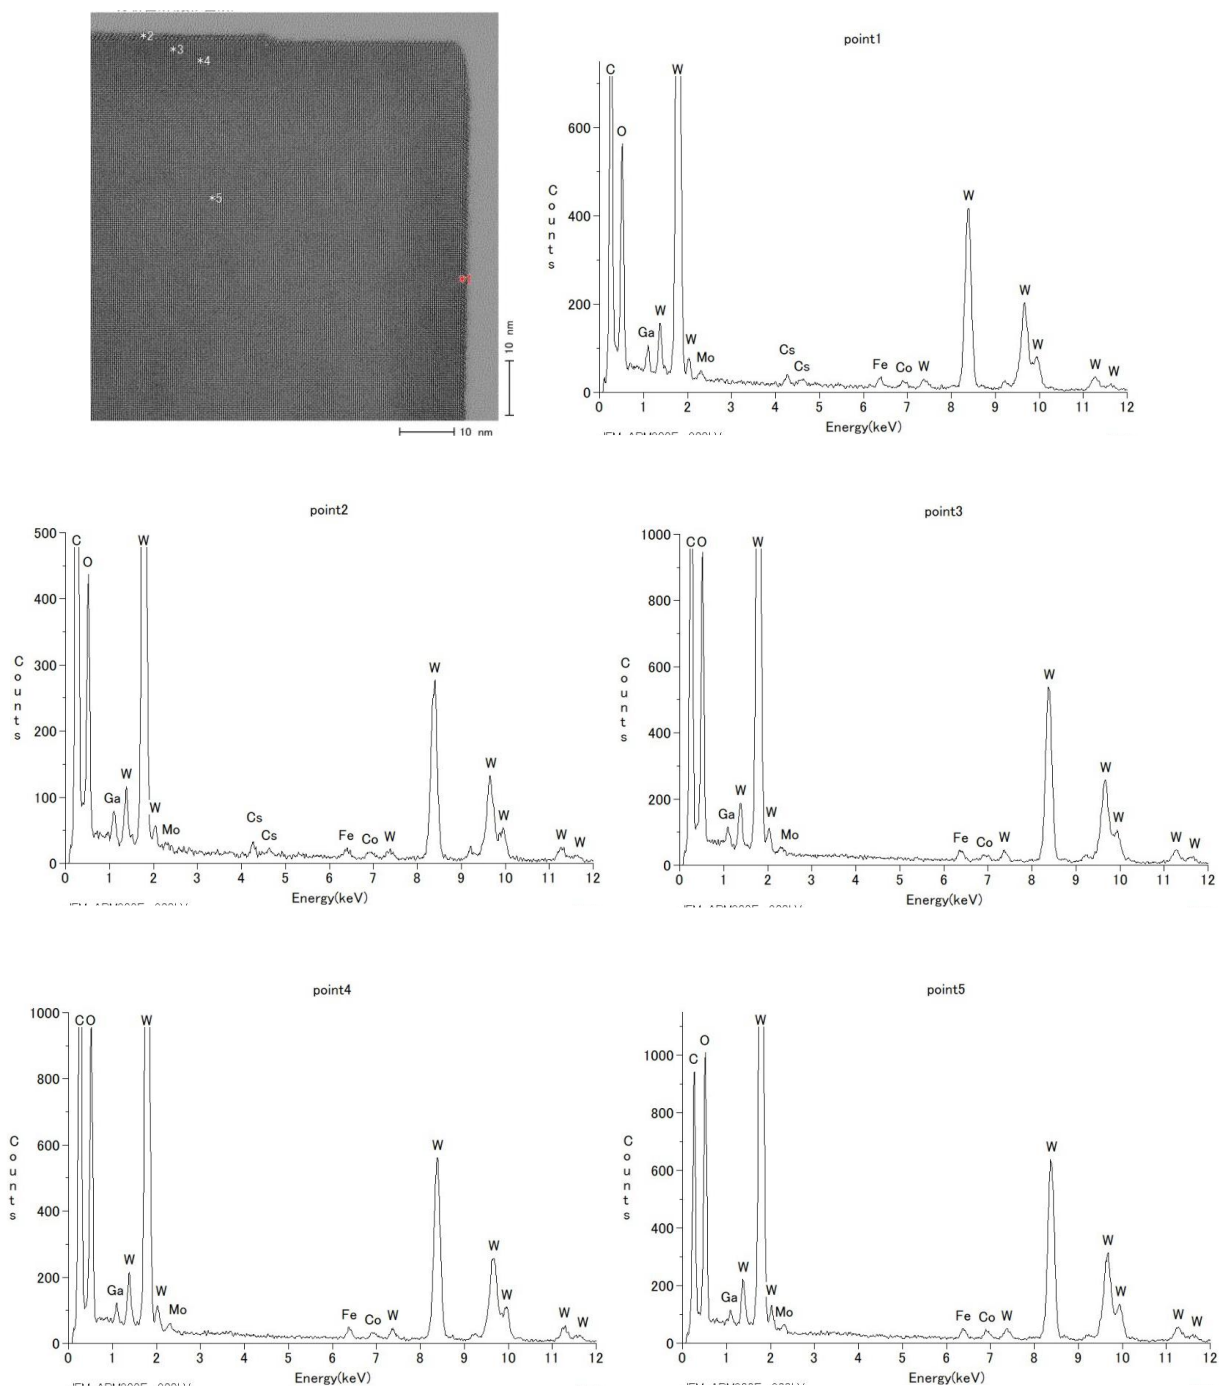

**Fig. S4** TEM-EDS analysis of  $\text{WO}_3:\text{Cs,Rh}(1.0)$  synthesized by a solid-state reaction at 1273 K for 5 h.

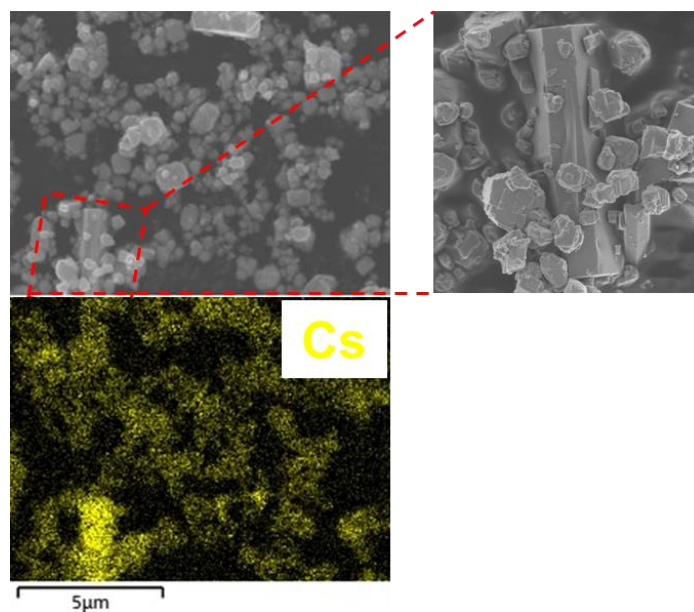

**Fig. S5** SEM and Cs-EDS mapping images of  $\text{WO}_3\text{:Cs,Rh(1.0)}$  synthesized by a solid-state reaction at 1273 K for 5 h.

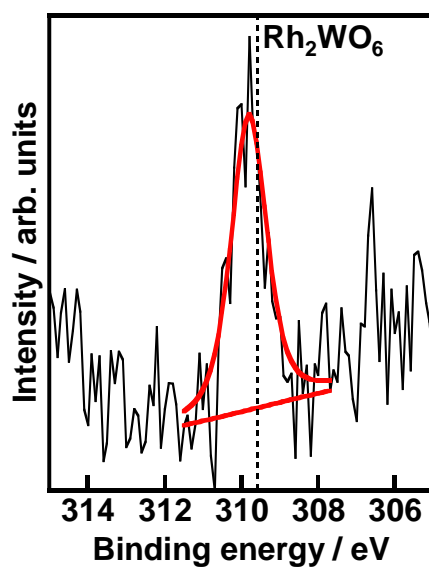

**Fig. S6** Rh 3d<sub>5/2</sub> XPS spectrum of  $\text{WO}_3\text{:Cs,Rh(1.0)}$  synthesized by a solid-state reaction at 1273 K for 5 h. The binding energy of the peak was calibrated with C 1s (284.2 eV).

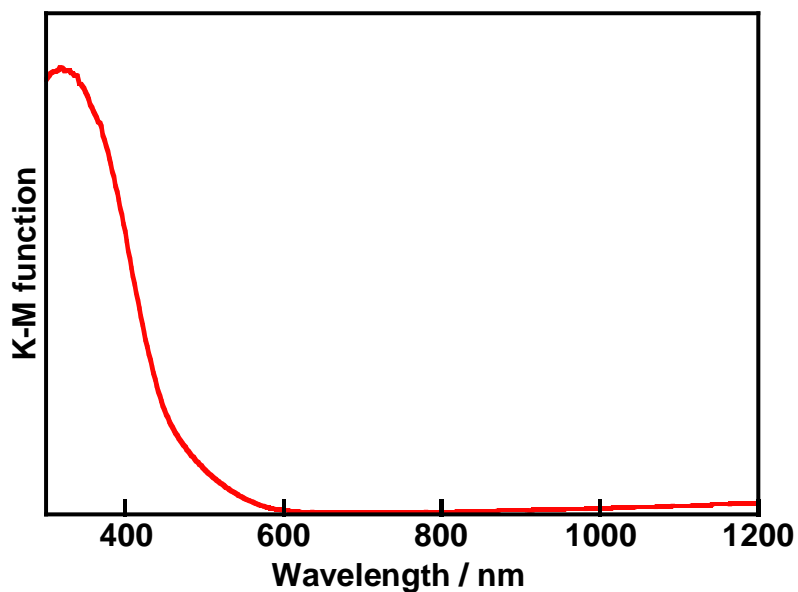

**Fig. S7** Diffuse reflectance spectrum of  $\text{WO}_3\text{:Cs,Rh(0.5)}$  synthesized by a solid-state reaction at 1273 K for 5 h.

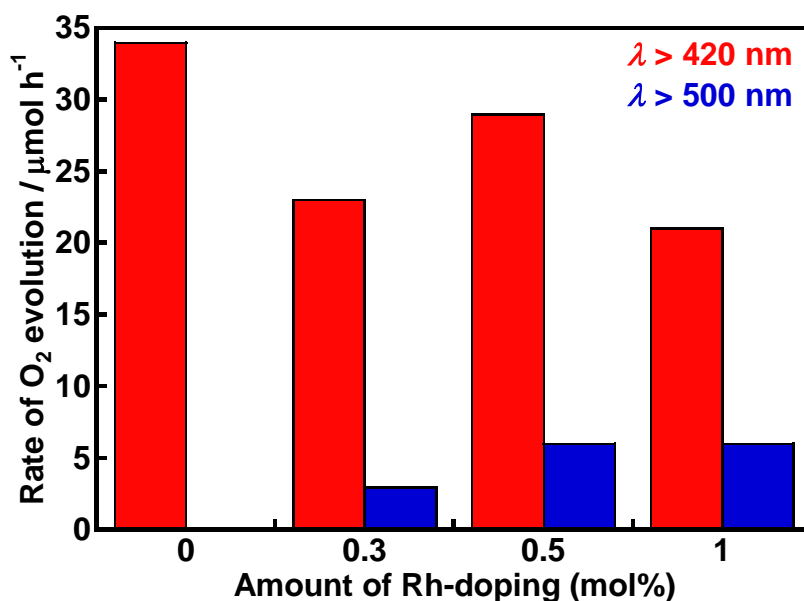

**Fig. S8** Photocatalytic O<sub>2</sub> evolution over  $\text{WO}_3\text{:Rh}(x)$  and  $\text{WO}_3\text{:Cs,Rh}(x)$  ( $x = 0\sim 1.0$ ) synthesized by a solid-state reaction at 1273 K for 5 h from an aqueous  $\text{Fe}(\text{ClO}_4)_3$  solution under irradiation of light with wavelength longer than 420 and 500 nm. Photocatalyst: 0.4 g, reactant solution: 4 mmol L<sup>-1</sup>  $\text{Fe}(\text{ClO}_4)_3$  aq. (pH 2.1 adjusted with  $\text{HClO}_4$  aq., 300 mL), cell: side-irradiation cell made of Pyrex, light source: 300 W Xe-arc lamp with a long-pass filter (HOYA; L42 or Y50).

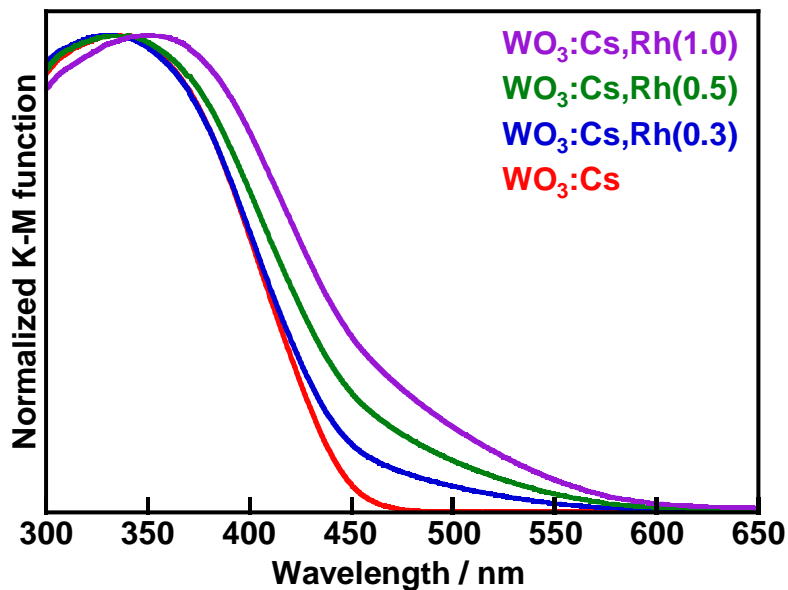

**Fig. S9** Diffuse reflectance spectra of  $\text{WO}_3\text{:Cs,Rh}(x\%)$  ( $x = 0, 0.3, 0.5, 1.0$ ) synthesized by a solid-state reaction at 1273 K for 5 h.

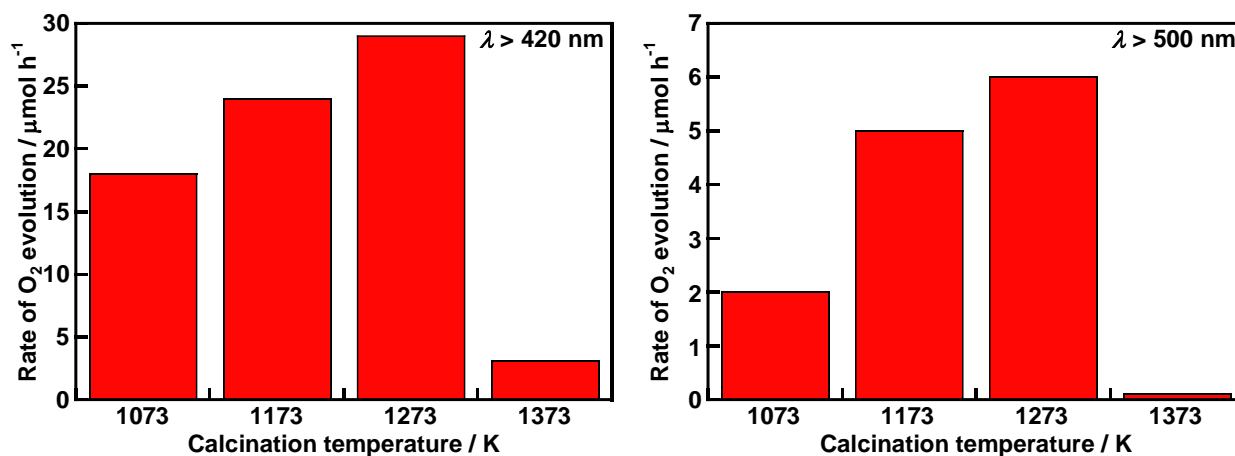

**Fig. S10** Photocatalytic  $\text{O}_2$  evolution over  $\text{WO}_3\text{:Cs,Rh}(0.5)$  synthesized by a solid-state reaction at 1073~1373 K for 5 h from an aqueous  $\text{Fe}(\text{ClO}_4)_3$  solution under irradiation of light with a wavelength longer than 420 and 500 nm. Photocatalyst: 0.4 g, reactant solution: 4 mmol  $\text{L}^{-1}$   $\text{Fe}(\text{ClO}_4)_3$  aq. (pH 2.1 adjusted with  $\text{HClO}_4$  aq., 300 mL), cell: side-irradiation cell made of Pyrex, light source: 300 W Xe-arc lamp with a long-pass filter (HOYA; L42 or Y50).

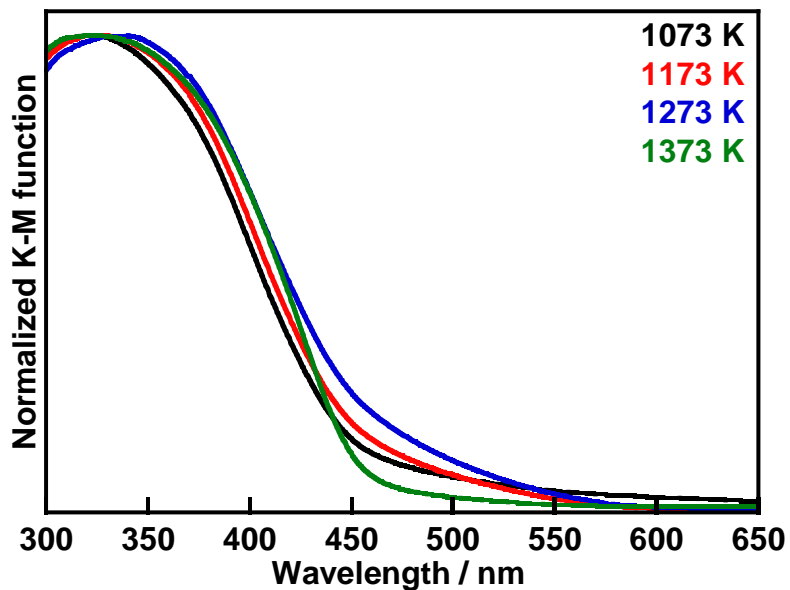

**Fig. S11** Diffuse reflectance spectra of  $\text{WO}_3\text{:Cs,Rh(0.5)}$  synthesized by a solid-state reaction at 1073~1373 K for 5 h.

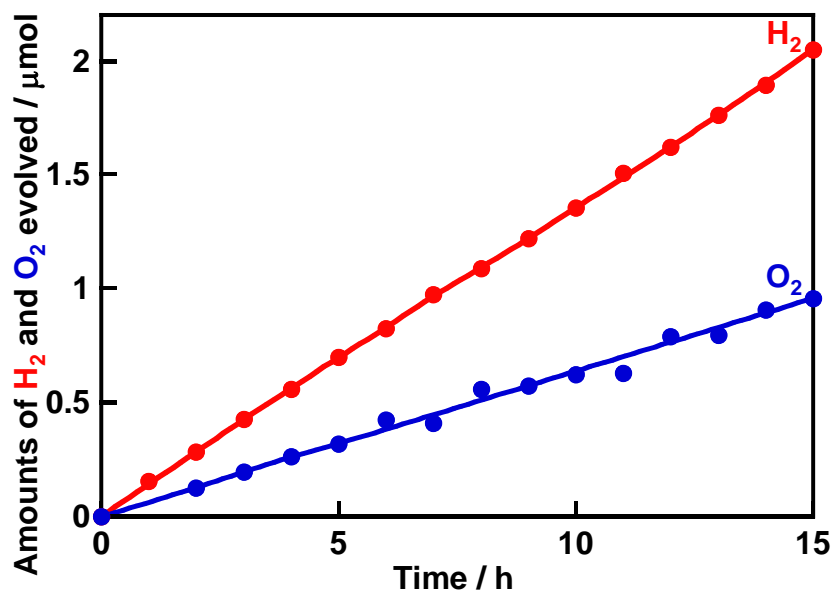

**Fig. S12** Z-schematic water splitting via interparticle electron transfer using  $\text{Ru/SrTiO}_3\text{:Rh}$  for a  $\text{H}_2$ -evolving photocatalyst and  $\text{WO}_3\text{:Cs,Rh(0.5)}$  synthesized at 1273 K for an  $\text{O}_2$ -evolving photocatalyst. Photocatalyst: 50 mg each, reactant solution:  $\text{HClO}_4$  aq. (pH2.3, 200 mL), cell: top-irradiation cell made of Pyrex, light source: 300 W Xe-arc lamp with a long-pass filter (HOYA; Y50).



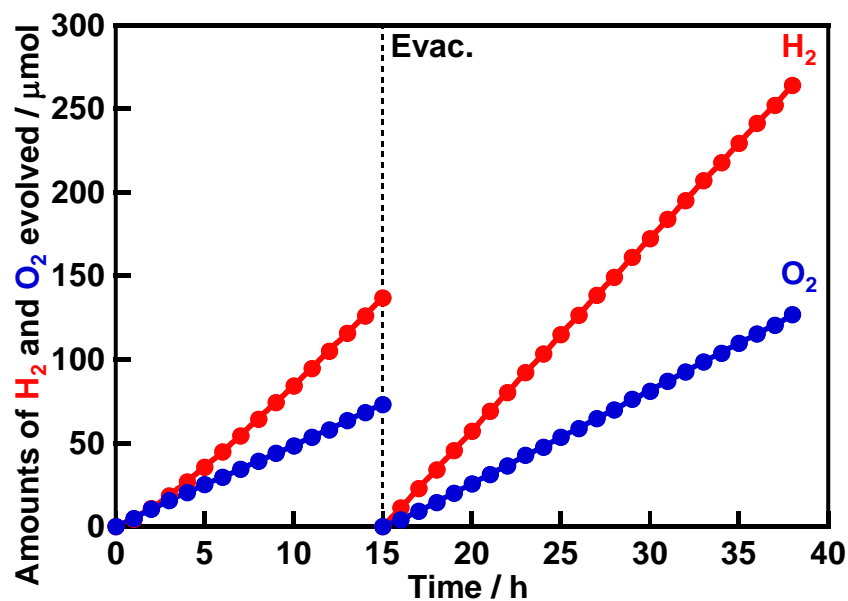

**Fig. S13** Z-schematic solar water splitting using Ru/SrTiO<sub>3</sub>:Rh for a H<sub>2</sub>-evolving photocatalyst, WO<sub>3</sub>:Cs,Rh(0.5) synthesized at 1273 K for an O<sub>2</sub>-evolving photocatalyst, and Fe<sup>3+/2+</sup> ion for an electron mediator. Photocatalyst: 50 mg each, reactant solution: 1 mmol L<sup>-1</sup> Fe(ClO<sub>4</sub>)<sub>3</sub> aq. (pH 2.3 adjusted with HClO<sub>4</sub> aq., 200 mL), cell: top-irradiation cell made of Pyrex, light source: solar simulator (SAN-EI ELECTRIC; XES-40S3-TT, AM-1.5 G), irradiation area: 25 cm<sup>2</sup>.
